# Supplementary material
Source: MDPI journal article supplement (https://www.mdpi.com/2073-4344/11/11/1367)
Supplement: s1 [file s1]

# Supplementary Material

## TiO<sub>2</sub>-zeolite-metal composites for photocatalytic degradation of organic pollutants in water

Nazely Diban <sup>1</sup>, Aleksandra Pacuła <sup>2</sup>, Izumi Kumakiri <sup>3</sup>, Carmen Barquín <sup>1</sup>, Maria J Rivero <sup>1</sup>, Ane Urtiaga <sup>1</sup>, Inmaculada Ortiz <sup>1\*</sup>

<sup>1</sup>Department of Chemical and Biomolecular Engineering, ETSIIyT. University of Cantabria, Avda. Los Castros s/n, 39005 Santander, Spain; dibann@uncan.es (N.D.); carmen.barquindiez@uncan.es (C.B.); mariajose.rivero@uncan.es (M.J.R.); urtiaga@uncan.es (A.U.); ortizi@uncan.es (I.O.)

<sup>2</sup>Jerzy Haber Institute of Catalysis and Surface Chemistry, Polish Academy of Sciences, Niezapominajek 8, Kraków, 30-239, Poland; ncpacula@cyfronet.pl (A.P.)

<sup>3</sup>Graduate School of Science and Technology for Innovation, Graduate School Science and Engineering, Yamaguchi University, Ube, 755-8611 (Japan); izumi.k@yamaguchi-u.ac.jp (I.K.)

\* Correspondence ortizi@uncan.es ; Tel.: +34 942201585 (I.O.)

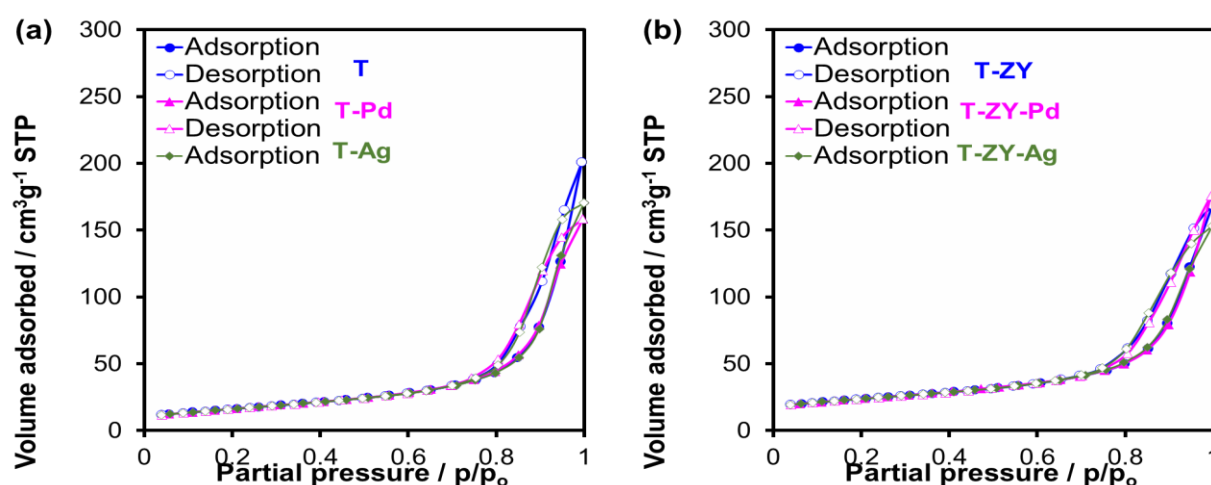

**Figure S1.** Nitrogen adsorption/desorption isotherms of (a) TiO<sub>2</sub> and TiO<sub>2</sub>-metal composites (after deposition of metal nanoparticles Pd – 1 %wt., or Ag – 0.05 %wt.) without zeolite Y and (b) after their deposition onto a physical mixture of TiO<sub>2</sub> and 5 %wt. zeolite Y.

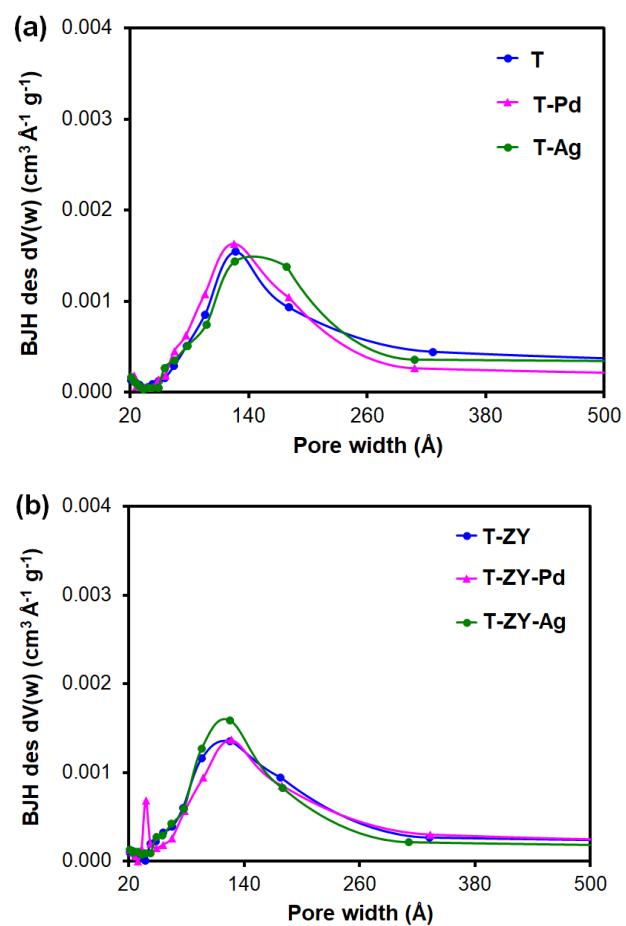

**Figure S2.** Pore size distribution (PSD) in the region of mesopores (20 – 500 Å) of (a) TiO<sub>2</sub> and T-metal composites (Pd – 1 %wt., or Ag – 0.05 %wt.) without zeolite Y and (b) after their deposition onto a physical mixture of TiO<sub>2</sub> and 5 %wt. zeolite Y calculated by using nitrogen sorption data from the desorption branch of nitrogen isotherm and the BJH (Barret-Joyner-Halenda) method.

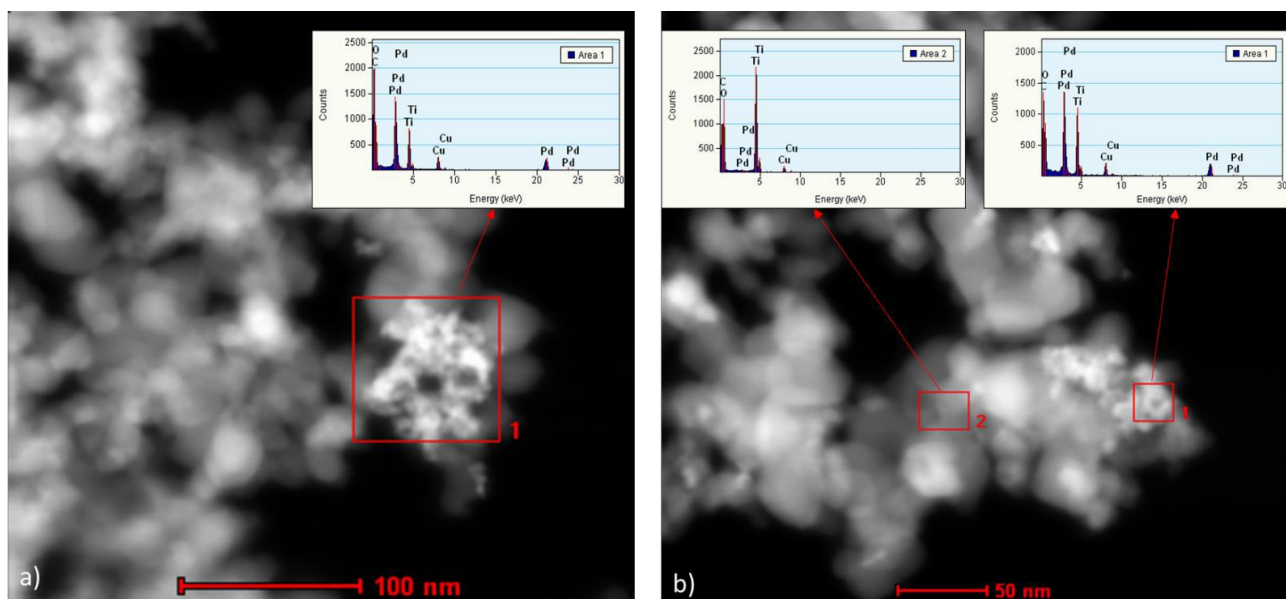

**Figure S3.** STEM image (a) and EDS spectrum (inset) of T-Pd and STEM image (b) and EDS spectra (insets area 1 and area 2) of T-ZY-Pd.

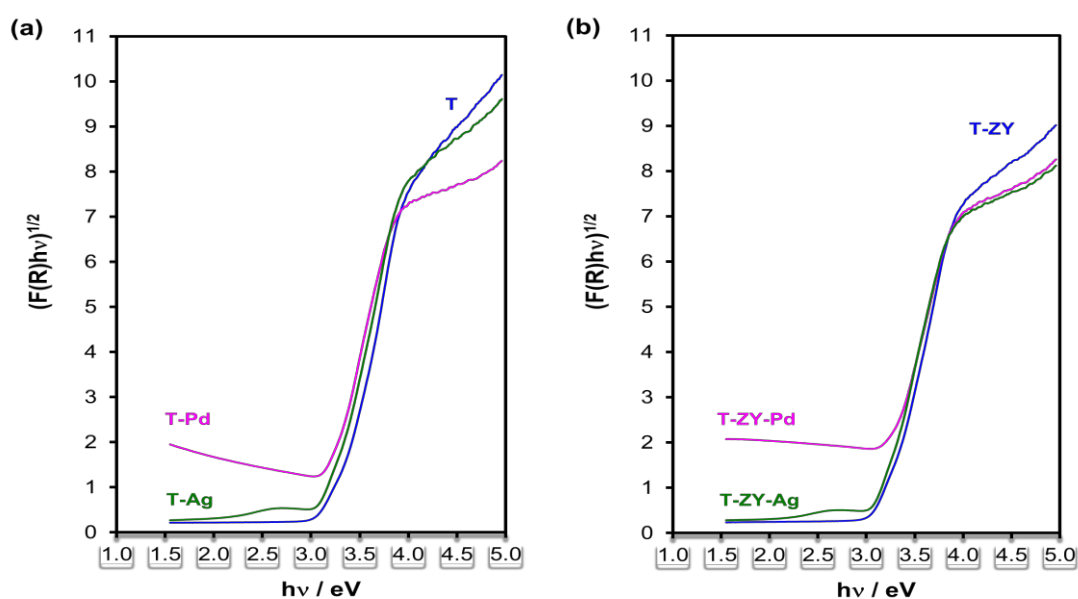

**Figure S4.** Tauc plots of (a) TiO<sub>2</sub> and a mixture of TiO<sub>2</sub> and zeolite Y (5 %wt.) with deposited metal nanoparticles (Pd – 1 %wt., Ag – 0.05 %wt.); and (b) TiO<sub>2</sub> and mixture of TiO<sub>2</sub> and zeolite Y (5 wt.%) with deposited metal (Pd-1 %wt. and Ag-0.05 %wt.) nanoparticles.

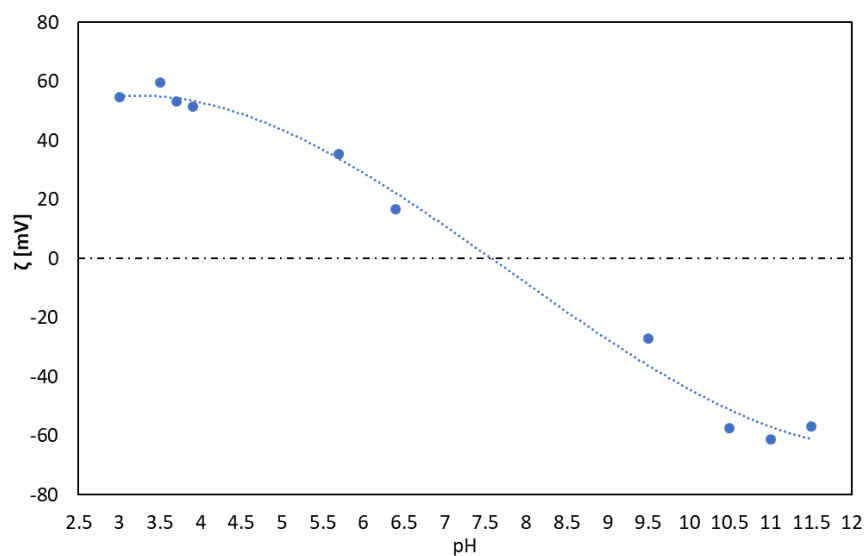

**Figure S5.** Dependence of zeta potential on pH of aqueous suspension of TiO<sub>2</sub> (Sigma Aldrich) at a concentration of 0.3 g L<sup>-1</sup>. Natural pH of the suspension is 4-5. pH adjusted by means of aqueous solutions of DCA (0.01 mol L<sup>-1</sup>, 0.1 mol L<sup>-1</sup>) or NaOH (0.01 mol L<sup>-1</sup>, 0.1 mol L<sup>-1</sup>).
